# Supplementary material for: Distinct evolutionary patterns of Oryza glaberrima deciphered by genome sequencing and comparative analysis
Source: PubMed Central journal article supplement (PMC3568898; doi:10.1111/j.1365-313x.2011.04539.x), 2011-03-21

Figure S1

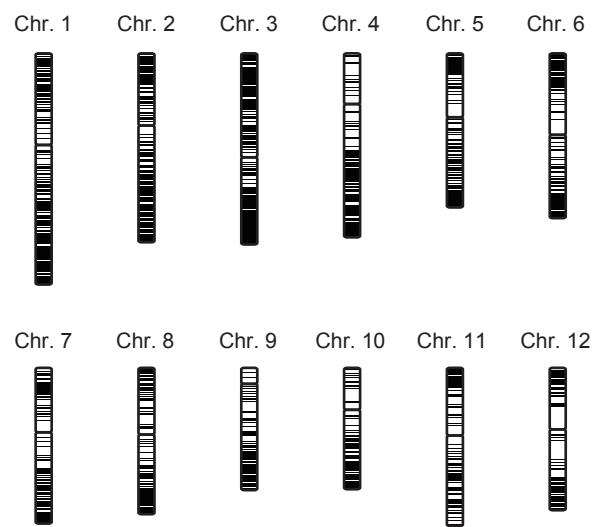

Supplement: tpj0066-0796-SD1.pdf [file tpj0066-0796-SD1.pdf]
